# Supplementary material for: The Novel Mechanisms Concerning the Inhibitions of Palmitate-Induced Proinflammatory Factor Releases and Endogenous Cellular Stress with Astaxanthin on MIN6 β-Cells
Source: MDPI journal article supplement (doi:10.3390/md15060185), 2017-06-20
Supplement: s1 [file s1]

# Supplementary Materials: The Novel Mechanisms Concerning the Inhibitions of Palmitate-Induced Proinflammatory Factor Releases and Endogenous Cellular Stress with Astaxanthin on MIN6 $\beta$ -cells

Atsuko Kitahara, Kazuto Takahashi, Naru Morita, Toshitaka Murashima, Hirohisa Onuma, Yoshikazu Sumitani, Toshiaki Tanaka, Takuma Kondo, Toshio Hosaka and Hitoshi Ishida

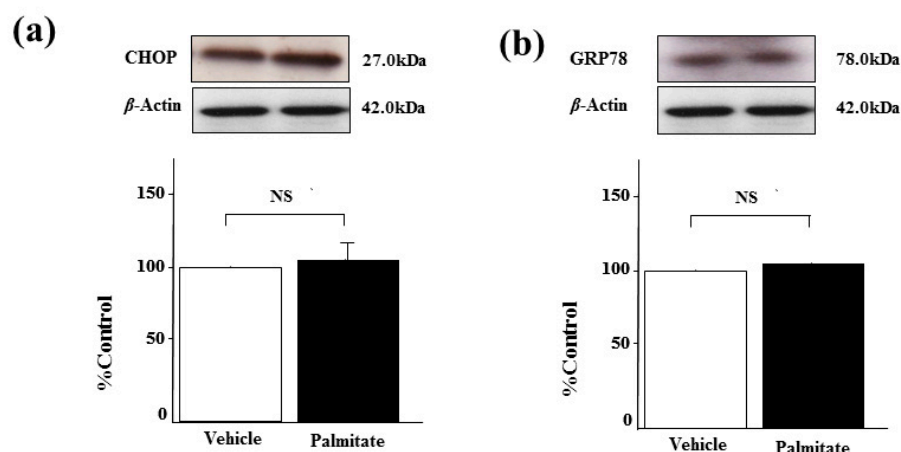

**Figure S1.** Palmitate (0.3 mmol/L) can not induce endoplasmic reticulum stress in hypertrophied 3T3-L1 adipocytes, in contrast to in MIN6  $\beta$ -cells. Mature 3T3-L1 adipocyte were preloaded with 0.3 mmol/L palmitate or ethanol vehicle alone for 24 h (A, B). A and B: Intracellular CHOP (a) and GRP78 (b) protein content were quantified by immunoblot analysis.  $\beta$ -Actin served as an internal control. Results are means  $\pm$  SE ( $n = 4$ ). \*\*  $p < 0.01$  compared to vehicle. NS; no significant difference compared to vehicle.
